# Supplementary material for: Efficient planar n-i-p type heterojunction flexible perovskite solar cells with sputtered TiO2electron transporting layers
Source: Royal Society of Chemistry journal article supplement (doi:10.1039/c6nr09032j), 2017-01-01

**Supporting Information**

**Efficient planar n-i-p type heterojunction flexible perovskite solar cells with sputtered TiO<sub>2</sub>  
electron transporting layers**

Sawanta S. Mali,<sup>a</sup> Chang Kook Hong<sup>a\*</sup>

*<sup>a</sup>Polymer Energy Materials Laboratory, School of Applied Chemical Engineering, Chonnam  
National University, Gwangju, 500-757, Republic of Korea*

**Figure S1 FESEM micrographs of BI-TiO<sub>2</sub> deposited at different deposition techniques.** (a) RF-sputtered TiO<sub>2</sub> 30nm, (b) RF-sputtered TiO<sub>2</sub> 50nm, (c) RF-Sputtered TiO<sub>2</sub> 100nm, (d) RF-Sputtered TiO<sub>2</sub> 50nm on Glass substrate, (e) spin coated and annealed at 450°C on FTO, (f) sol-gel processed TiO<sub>2</sub> spin coated on ITO, (f) sol gel processed TiO<sub>2</sub> spin coated on PET substrate. (g-j) Cross sectional images of RF-sputtered BI-TiO<sub>2</sub> with 30, 50 and 100nm thickness respectively. (Scale bar 100nm)

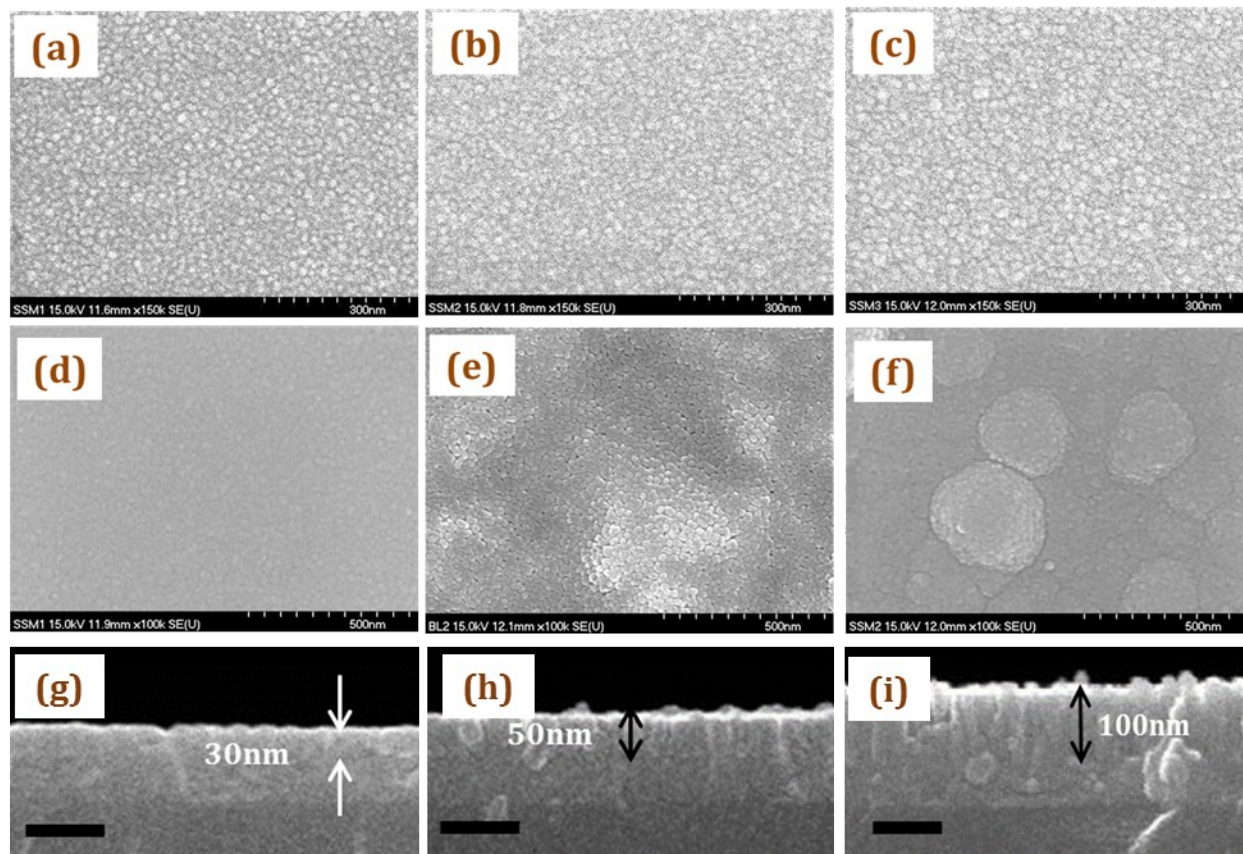

**Figure S2. XRD patterns of BI-TiO<sub>2</sub> deposited at different deposition techniques:** (a) traditional method spin coated and annealed at 450°C (b) sol-gel processed spin coated and annealed at 450°C (c) room temperature processed RF-magnetron sputtered TiO<sub>2</sub> at different thicknesses. Inset shows respective photographs of each sample. (d) Photograph of highly transparent 50nm thick BI-TiO<sub>2</sub> layer deposited by RF-magnetron sputtering.

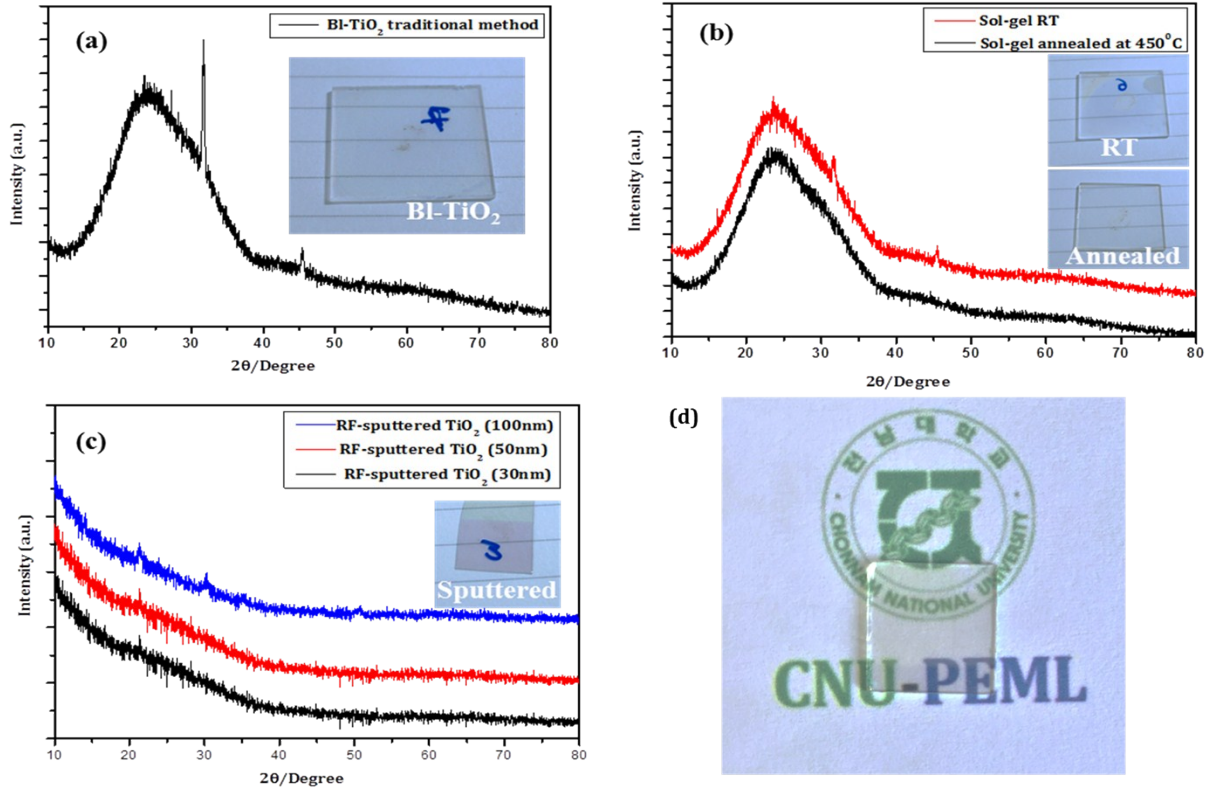

**Figure S3** XPS spectra of the TiO<sub>2</sub> ETL deposited by different techniques. (a) Ti2p core level spectra (b) core level spectra of O1s.

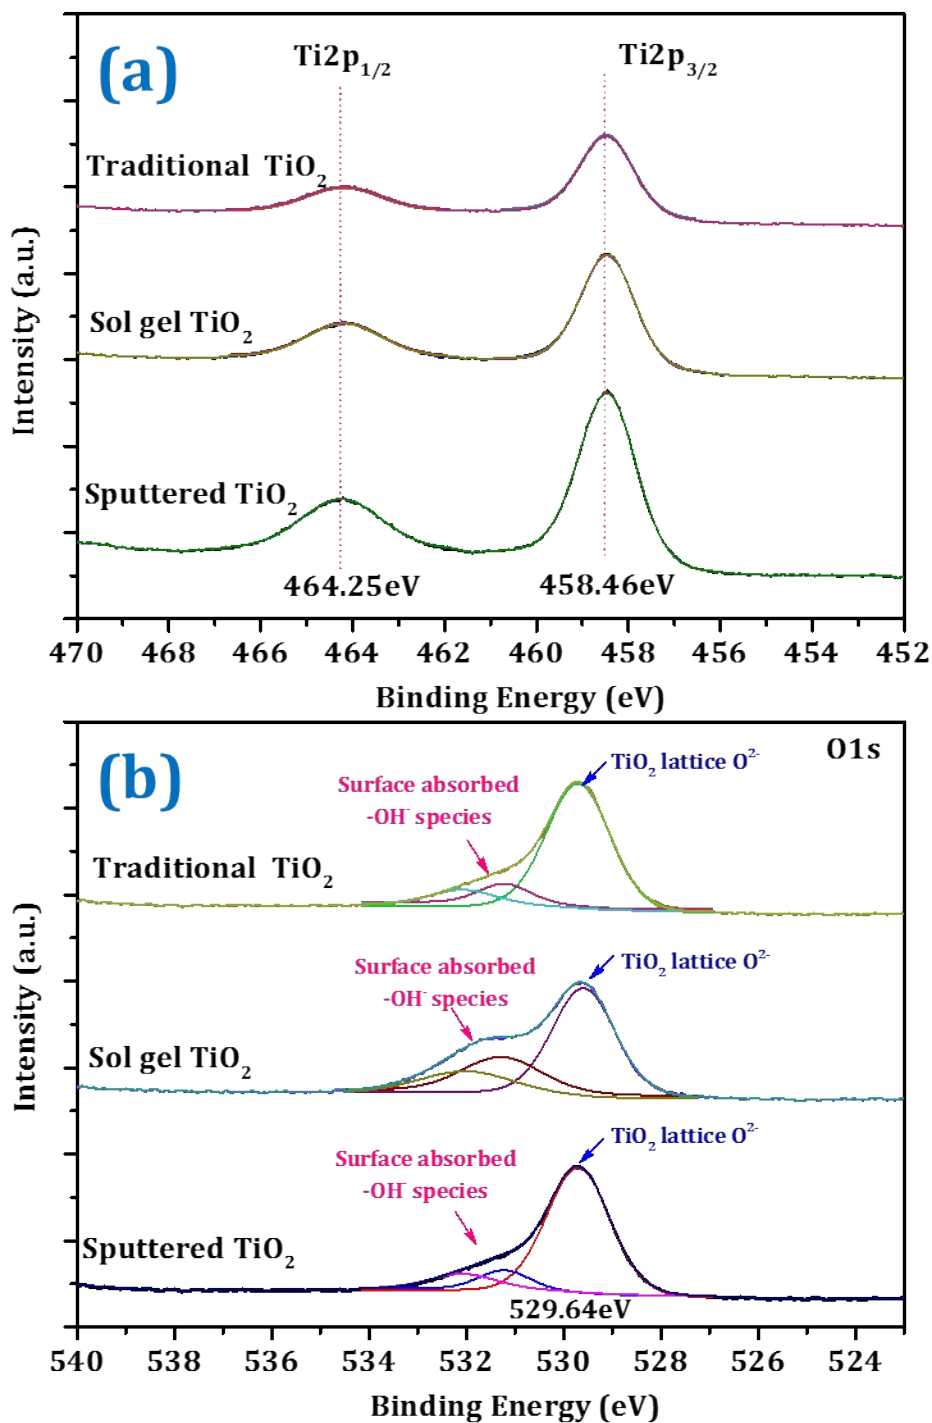

**Figure S4 FESEM and AFM images of a perovskite layer** (a) Highly magnified FEEM image of  $\text{MAPb}(\text{I}_{1-x}\text{Br}_x)_3$  thin film deposited without toluene dripping (b) AFM topography top view and (c) three-dimensional views (right) of the surface of the  $\text{MAPb}(\text{I}_{1-x}\text{Br}_x)_3$  thin film. The size of the AFM images is  $5 \times 5 \mu\text{m}^2$ . The measured root mean square roughness is 22.234nm.

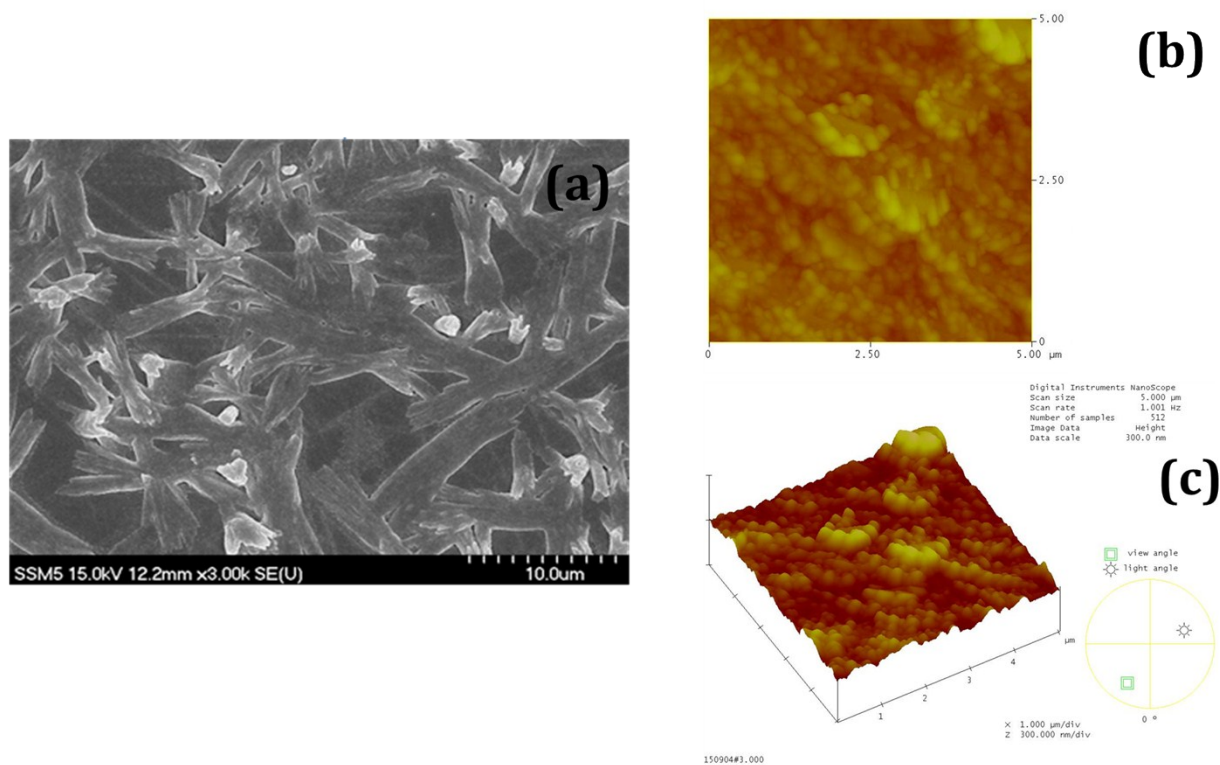

**Figure S5 FESEM and AFM images of a perovskite solar cell;**(a) Highly magnified FEEM image of MAPb(I<sub>1-x</sub>Br<sub>x</sub>)<sub>3</sub> thin film deposited on FTO/Bi-TiO<sub>2</sub> (b) AFM topography top view and (c) three-dimensional views (right) of the surface of the MAPb(I<sub>1-x</sub>Br<sub>x</sub>)<sub>3</sub> thin film deposited on Glass/FTO/Bi-TiO<sub>2</sub> substrate. The size of the AFM images is 5 x 5 μm<sup>2</sup>. The measured root mean square roughness is 15.653nm.

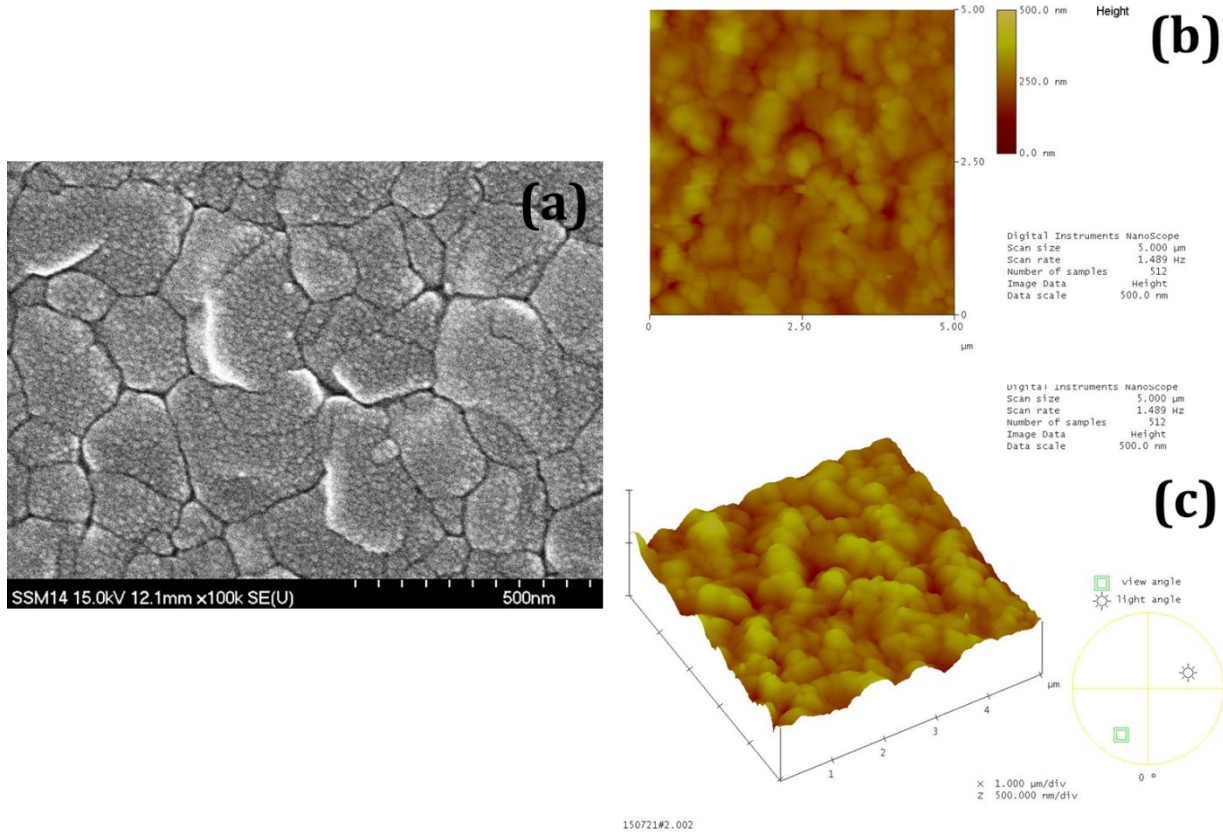

**Figure S6. Compositional analysis of MAPb(I<sub>1-x</sub>Br<sub>x</sub>)<sub>3</sub>** (a) FESEM (b) EDS spectrum, Inset table shows EDS analysis.

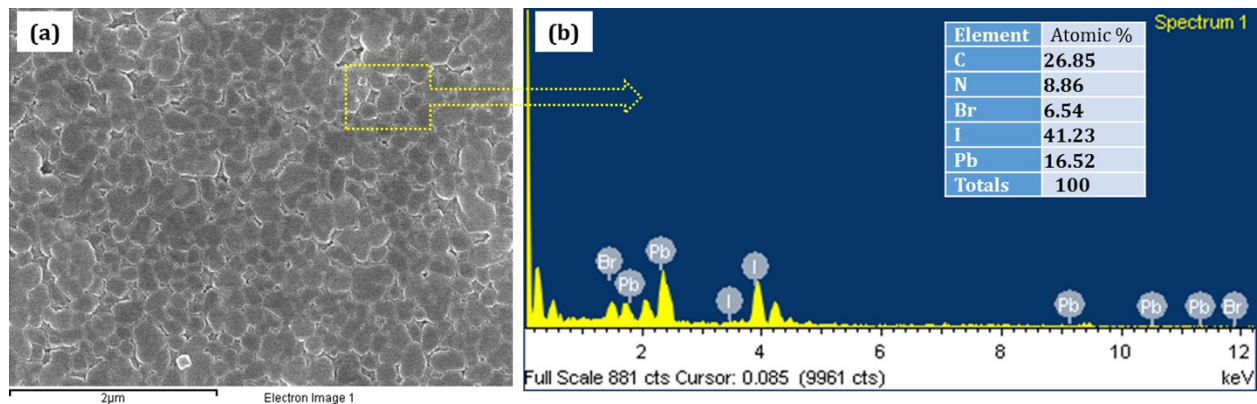

From the above figure, it is clear that, the signals of Pb, I and Br were detected. Furthermore, the C and N signal have been taken into consideration for the exact 100% composition of the MAPb(I<sub>3-x</sub>Br<sub>x</sub>)<sub>3</sub> composition. The ratio of atomic content of Pb:I:Br was about 1:2.50:0.39, close to the ratio of 1:2.7:0.3 as per experimental composition.

**Figure S7. Effect of toluene dripping study:** (a) SEM microscopic images of planar heterojunction flexible perovskite solar cell with and without toluene drop casting (b) respective hysteresis analysis.

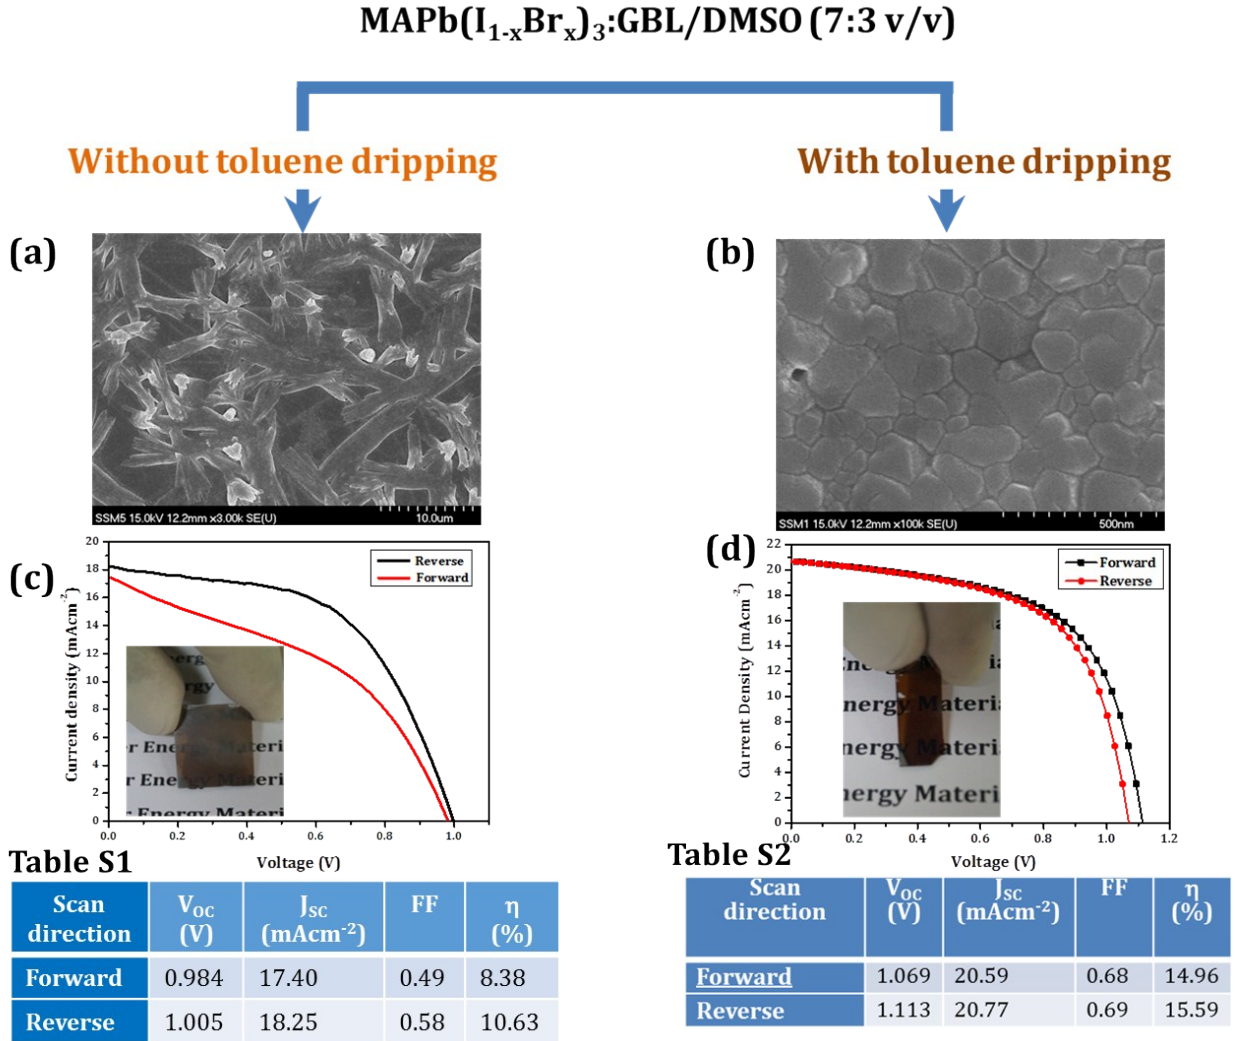

Supplement: c6nr09032j1.pdf [file c6nr09032j1.pdf]
